# Supplementary material for: Early weaning increases aggression and stereotypic behaviour in cats
Source: PubMed Central journal article supplement (PMC5583233; doi:10.1038/s41598-017-11173-5), 2017-09-04
Supplement: 41598_2017_11173_MOESM1_ESM.pdf [file 41598_2017_11173_MOESM1_ESM.pdf]

# **Early weaning increases aggression and stereotypic behaviour in cats**

**Milla K. Ahola, Katariina Vapalahti, Hannes Lohi**

**Supplementary Table S1.** Descriptive statistics.

|                             |                       | N    | %     |
|-----------------------------|-----------------------|------|-------|
| Sex                         | Female                | 3086 | 53.89 |
|                             | Male                  | 2640 | 46.11 |
| Weaning age                 | <8 weeks              | 177  | 3.09  |
|                             | 8-9 weeks             | 223  | 3.89  |
|                             | 10-11 weeks           | 311  | 5.43  |
|                             | 12-13 weeks           | 2732 | 47.71 |
|                             | 14-15 weeks           | 1010 | 17.64 |
|                             | 16 weeks - 1 year     | 577  | 10.08 |
|                             | As an adult           | 119  | 2.08  |
|                             | Not weaned            | 577  | 10.08 |
| Other cats in the household | No                    | 874  | 15.26 |
|                             | Yes                   | 4852 | 84.74 |
| Access to outdoors          | Daily                 | 1493 | 26.07 |
|                             | 3-5 times a week      | 767  | 13.4  |
|                             | 1-2 times a week      | 538  | 9.4   |
|                             | 1-2 times a month     | 577  | 10.08 |
|                             | Few times a year      | 1280 | 22.35 |
|                             | Never                 | 1071 | 18.7  |
| Neutering status            | Intact                | 1261 | 22.02 |
|                             | Neutered              | 4465 | 77.98 |
| Cat breed group             | Cat breed             | N    | %     |
| ABY                         | Abyssinian            | 108  | 1.89  |
|                             | Ocicat                | 180  | 3.14  |
|                             | Somali                | 105  | 1.83  |
| BEN                         | Bengal                | 228  | 3.98  |
| BRI                         | British Shorthair     | 244  | 4.26  |
| BUR                         | Burmese               | 242  | 4.23  |
|                             | Burmilla              | 35   | 0.61  |
| CRX                         | Cornish Rex           | 298  | 5.2   |
| DRX                         | Devon Rex             | 213  | 3.72  |
| EUR                         | European Shorthair    | 185  | 3.23  |
| HCS                         | House Cat             | 836  | 14.6  |
| KOR                         | Korat                 | 174  | 3.04  |
| MCO                         | Maine Coon            | 320  | 5.59  |
| NFO                         | Norwegian Forest Cat  | 301  | 5.26  |
|                             | Balinese              | 41   | 0.72  |
| ORI                         | Oriental Longhair     | 24   | 0.42  |
|                             | Oriental Shorthair    | 136  | 2.38  |
|                             | Seychellois Longhair  | 2    | 0.03  |
|                             | Seychellois Shorthair | 7    | 0.12  |
|                             | Siamese               | 97   | 1.69  |
| PER                         | Exotic Shorthair      | 32   | 0.56  |
|                             | Persian               | 194  | 3.39  |

|       |                    |     |      |
|-------|--------------------|-----|------|
| RAG   | Ragdoll            | 308 | 5.38 |
| RUS   | Russian Blue       | 268 | 4.68 |
| SBI   | Birman             | 293 | 5.12 |
| SIB   | Neva Masquerade    | 7   | 0.12 |
|       | Siberian           | 291 | 5.08 |
| TUV   | Turkish Angora     | 43  | 0.75 |
|       | Turkish Van        | 126 | 2.2  |
| other | American Curl      | 56  | 0.98 |
|       | Longhair           |     |      |
|       | American Curl      | 23  | 0.4  |
|       | Shorthair          |     |      |
|       | American Shorthair | 1   | 0.02 |
|       | Chartreux          | 17  | 0.3  |
|       | Cymric             | 33  | 0.58 |
|       | Don Sphynx         | 13  | 0.23 |
|       | Kurilian Bobtail   | 11  | 0.19 |
|       | Manx               | 56  | 0.98 |
|       | Egyptian Mau       | 13  | 0.23 |
|       | Sphynx             | 134 | 2.34 |
|       | Selkirk Rex        | 4   | 0.07 |
|       | other              | 27  | 0.47 |

**Supplementary Table S2.** Component loadings of the personality traits on three Varimax-rotated principal components.

| Trait labels                      | Aggressiveness | Shyness     | Extraversion |
|-----------------------------------|----------------|-------------|--------------|
| Aggression towards other cats     | <b>0.75</b>    | 0.12        | 0.01         |
| Aggression towards family members | <b>0.90</b>    | 0.08        | -0.03        |
| Aggression towards strangers      | <b>0.88</b>    | 0.15        | -0.05        |
| Activity level                    | -0.02          | -0.02       | <b>0.89</b>  |
| Shyness towards novel objects     | 0.15           | <b>0.93</b> | -0.10        |
| Shyness towards strangers         | 0.15           | <b>0.93</b> | -0.17        |
| Contact to people                 | -0.03          | -0.26       | <b>0.83</b>  |

**Supplementary Table S3.** The AIC model selection and the final models of logistic regression analyses. N = 5726 (personality trait analyses), N = 4925 (wool sucking analysis), N = 5683 (excessive grooming analysis), N = 5550 (owner-evaluated behaviour problem analysis).

| <b>Contact to people</b>                                                                            |                 |                 |                          |                       |                       |                 |
|-----------------------------------------------------------------------------------------------------|-----------------|-----------------|--------------------------|-----------------------|-----------------------|-----------------|
| Model                                                                                               | AIC             | Shyness added   | Breed added              | Other cats added      | Hormonal status added |                 |
| Basic model (weaning age, sex, and age)                                                             | 6194.818        |                 |                          |                       |                       |                 |
| Shyness                                                                                             | <b>5935.28</b>  | 5935.28         |                          |                       |                       |                 |
| Breed                                                                                               | 6089.582        | <b>5819.472</b> | 5819.472                 |                       |                       |                 |
| Other cats                                                                                          | 6193.983        | 5932.355        | <b>5813.898</b>          | 5813.898              |                       |                 |
| Hormonal status                                                                                     | 6195.819        | 5926.21         | 5816.637                 | <b>5811.226</b>       | <b>5811.226</b>       |                 |
| Access to outdoors                                                                                  | 6196.279        | 5936.464        | 5820.469                 | 5815.569              | 5813.516              |                 |
| Weaning age*other cats                                                                              | 6197.873        | 5938.217        | 5819.205                 | 5819.205              | 5816.856              |                 |
| Aggressiveness                                                                                      | 6191.126        | 5936.794        | 5821.452                 | 5815.637              | 5812.857              |                 |
| Final model: Weaning age, sex, age, shyness, breed, other cats, hormonal status                     |                 |                 |                          |                       |                       |                 |
| <b>Aggression towards family members</b>                                                            |                 |                 |                          |                       |                       |                 |
| Model                                                                                               | AIC             | Breed added     | Other cats added         | Hormonal status added | Extraversion added    |                 |
| Basic model (weaning, sex, and age)                                                                 | 3099.964        |                 |                          |                       |                       |                 |
| Breed                                                                                               | <b>3015.063</b> | 3015.063        |                          |                       |                       |                 |
| Other cats                                                                                          | 3035.787        | <b>2955.62</b>  | 2955.62                  |                       |                       |                 |
| Hormonal status                                                                                     | 3092.051        | 3010.607        | <b>2951.281</b>          | 2951.281              |                       |                 |
| Extraversion                                                                                        | 3101.216        | 3014.387        | 2952.785                 | <b>2948.436</b>       | <b>2948.436</b>       |                 |
| Access to outdoors                                                                                  | 3100.015        | 3016.276        | 2958.094                 | 2954.04               | 2951.08               |                 |
| Shyness                                                                                             | 3101.86         | 3015.258        | 2955.328                 | 2950.076              | 2947.642              |                 |
| Weaning age*other cats                                                                              | 3041.735        | 2959.611        | 2959.611                 | 2955.212              | 2952.715              |                 |
| Final model: Weaning age, sex, age, breed, other cats, hormonal status, extraversion                |                 |                 |                          |                       |                       |                 |
| <b>Aggression towards strangers</b>                                                                 |                 |                 |                          |                       |                       |                 |
| Model                                                                                               | AIC             | Breed added     | Access to outdoors added | Other cats added      | Hormonal status added | Shyness added   |
| Basic model (weaning, sex, and age)                                                                 | 3362.713        |                 |                          |                       |                       |                 |
| Breed                                                                                               | <b>3279.463</b> | 3279.463        |                          |                       |                       |                 |
| Access to outdoors                                                                                  | 3344.691        | <b>3262.459</b> | 3262.459                 |                       |                       |                 |
| Other cats                                                                                          | 3345.145        | 3262.632        | <b>3246.819</b>          | 3246.819              |                       |                 |
| Hormonal status                                                                                     | 3353.584        | 3274.099        | 3257.595                 | <b>3241.758</b>       | 3241.758              |                 |
| Shyness                                                                                             | 3354.83         | 3275.327        | 3257.859                 | 3242.744              | <b>3238.925</b>       | <b>3238.925</b> |
| Extraversion                                                                                        | 3364.436        | 3279.418        | 3262.381                 | 3245.887              | 3240.873              | 3237.654        |
| Weaning age*other cats                                                                              | 3356.185        | 3274.414        | 3258.863                 | 3258.863              | 3253.775              | 3250.789        |
| Final model: weaning age, sex, age, breed, access to outdoors, other cats, hormonal status, shyness |                 |                 |                          |                       |                       |                 |

---

**Aggression towards other cats**

---

|                                     | AIC             | Breed added     | Hormonal status added | Other cats added | Shyness added   | Access to outdoors added |
|-------------------------------------|-----------------|-----------------|-----------------------|------------------|-----------------|--------------------------|
| Basic model (weaning, sex, and age) | 7542.074        |                 |                       |                  |                 |                          |
| Breed                               | <b>7444.595</b> | 7444.595        |                       |                  |                 |                          |
| Hormonal status                     | 7474.514        | <b>7392.165</b> | 7392.165              |                  |                 |                          |
| Other cats                          | 7498.481        | 7405.784        | <b>7354.568</b>       | 7354.568         |                 |                          |
| Shyness                             | 7490.371        | 7408.984        | 7365.922              | <b>7329.202</b>  | 7329.202        |                          |
| Access to outdoors                  | 7524.745        | 7423.756        | 7374.277              | 7338.132         | <b>7312.915</b> | <b>7312.915</b>          |
| Extraversion                        | 7534.58         | 7442.118        | 7389.526              | 7353.254         | 7328.414        | 7312.498                 |
| Weaning age*other cats              | 7509.741        | 7417.397        | 7365.875              | 7365.875         | 7340.067        | 7323.724                 |

Final model: weaning age, sex, age, breed, hormonal status, other cats, shyness, access to outdoors

---

**Shyness towards novel objects**

|                                     | AIC             | Breed added     | Hormonal status added | Extraversion added | Access to outdoors added | Other cats added |
|-------------------------------------|-----------------|-----------------|-----------------------|--------------------|--------------------------|------------------|
| Basic model (weaning, sex, and age) | 7372.532        |                 |                       |                    |                          |                  |
| Breed                               | <b>7209.506</b> | 7209.506        |                       |                    |                          |                  |
| Hormonal status                     | 7287.195        | <b>7142.620</b> | 7142.620              |                    |                          |                  |
| Extraversion                        | 7335.832        | 7170.651        | <b>7103.453</b>       | 7103.453           |                          |                  |
| Access to outdoors                  | 7359.735        | 7187.721        | 7125.314              | <b>7086.588</b>    | 7086.588                 |                  |
| Other cats                          | 7357.747        | 7200.273        | 7134.165              | 7092.579           | <b>7075.810</b>          | <b>7075.8100</b> |
| Weaning age *other cats             | 7368.509        | 7212.386        | 7145.71               | 7103.944           | 7087.079                 | 7087.079         |
| Weaning age*sex                     | 7375.219        | 7208.943        | 7141.172              | 7101.272           | 7084.300                 | 7074.045         |
| Aggressiveness                      | 7369.085        | 7209.321        | 7143.389              | 7103.473           | 7087.104                 | 7077.243         |

Final model: weaning age, sex, age, breed, hormonal status, extraversion, access to outdoors, other cats

---

**Shyness towards strangers**

|                                     | AIC             | Breed added     | Extraversion added | Hormonal status added | Other cats added |
|-------------------------------------|-----------------|-----------------|--------------------|-----------------------|------------------|
| Basic model (weaning, sex, and age) | 7873.925        |                 |                    |                       |                  |
| Breed                               | <b>7678.998</b> | 7678.998        |                    |                       |                  |
| Extraversion                        | 7791.883        | <b>7603.068</b> | 7603.068           |                       |                  |
| Hormonal status                     | 7817.186        | 7631.347        | <b>7555.133</b>    | 7555.133              |                  |
| Other cats                          | 7869.034        | 7677.789        | 7599.844           | <b>7552.338</b>       | <b>7552.338</b>  |
| Access to outdoors                  | 7875.907        | 7675.616        | 7599.46            | 7554.362              | 7551.62          |
| Weaning age*other cats              | 7872.085        | 7683.372        | 7605.44            | 7557.477              | 7557.477         |
| Weaning age*sex                     | 7878.784        | 7682.201        | 7605.81            | 7557.164              | 7554.589         |
| Aggressiveness                      | 7870.500        | 7677.009        | 7599.347           | 7552.752              | 7551.039         |

Final model: weaning age, sex, age, breed, extraversion, hormonal status, other cats

---

**Wool sucking**

|                                     | AIC             | Breed added | Access to outdoors added | Shyness added | Extraversion added | Aggressiveness added |
|-------------------------------------|-----------------|-------------|--------------------------|---------------|--------------------|----------------------|
| Basic model (weaning, sex, and age) | 4978.367        |             |                          |               |                    |                      |
| Breed                               | <b>4883.292</b> | 4883.292    |                          |               |                    |                      |

|                        |          |                 |                 |                 |                 |                 |
|------------------------|----------|-----------------|-----------------|-----------------|-----------------|-----------------|
| Access to outdoors     | 4937.595 | <b>4835.361</b> | 4835.361        |                 |                 |                 |
| Shyness                | 4937.384 | 4849.526        | <b>4801.842</b> | 4801.842        |                 |                 |
| Extraversion           | 4954.324 | 4867.687        | 4818.304        | <b>4786.709</b> | 4786.709        |                 |
| Aggression             | 4962.224 | 4874.703        | 4827.48         | 4788.315        | <b>4774.684</b> | <b>4774.684</b> |
| Other cats             | 4979.382 | 4884.94         | 4837.016        | 4803.595        | 4788.644        | 4776.629        |
| Weaning age*other cats | 4988.618 | 4988.618        | 4948.223        | 4907.807        | 4886.961        | 4868.731        |

Final model: weaning age, sex, age, breed, access to outdoors, shyness, extraversion, aggressiveness

---

### Excessive grooming

|                                     | AIC             | Breed added                              | Shyness added   | Aggressiveness added | Access to outdoors added | Extraversion added |
|-------------------------------------|-----------------|------------------------------------------|-----------------|----------------------|--------------------------|--------------------|
| Basic model (weaning, sex, and age) | 2343.552        |                                          |                 |                      |                          |                    |
| Breed                               | <b>2305.749</b> | 2305.749                                 |                 |                      |                          |                    |
| Shyness                             | 2314.938        | <b>2282.797</b>                          | 2282.797        |                      |                          |                    |
| Aggression                          | 2326.239        | 2289.818                                 | <b>2260.844</b> | 2260.844             |                          |                    |
| Access to outdoors                  | 2327.743        | 2296.641                                 | 2273.322        | <b>2251.815</b>      | 2251.815                 |                    |
| Extraversion                        | 2332.362        | 2301.285                                 | 2279.433        | 2258.187             | <b>2248.728</b>          | <b>2248.728</b>    |
| Other cats                          | 2339.043        | 2300.291                                 | 2277.618        | 2259.039             | 2249.884                 | 2247.297           |
| Weaning age*other cats              | 2338.281        | quasi-complete separation of data points |                 |                      |                          |                    |

Final model: weaning age, sex, age, breed, shyness, aggressiveness, access to outdoors, extraversion

---

### Owner-evaluated behaviour problem

|                                     | AIC             | Aggression added | Stereotypy added | Shyness added   | Breed added     | Other cats added |
|-------------------------------------|-----------------|------------------|------------------|-----------------|-----------------|------------------|
| Basic model (weaning, sex, and age) | 3305.6          |                  |                  |                 |                 |                  |
| Aggression                          | <b>3190.595</b> |                  |                  |                 |                 |                  |
| Stereotypy                          | 3246.079        | <b>3143.281</b>  | 3143.281         |                 |                 |                  |
| Shyness                             | 3277.504        | 3148.98          | <b>3108.287</b>  | 3108.287        |                 |                  |
| Breed                               | 3292.842        | 3181.491         | 3135.417         | <b>3097.588</b> | 3097.588        |                  |
| Other cats                          | 3307.369        | 3188.503         | 3139.986         | 3104.747        | <b>3095.031</b> | <b>3095.031</b>  |
| Access to outdoors                  | 3313.247        | 3197.885         | 3150.544         | 3116.386        | 3105.829        | 3103.24          |
| Extraversion                        | 3307.6          | 3192.304         | 3143.281         | 3108.558        | 3095.662        | 3093.661         |

Final model: weaning age, sex, age, aggression, stereotypy, shyness, breed, other cats

---

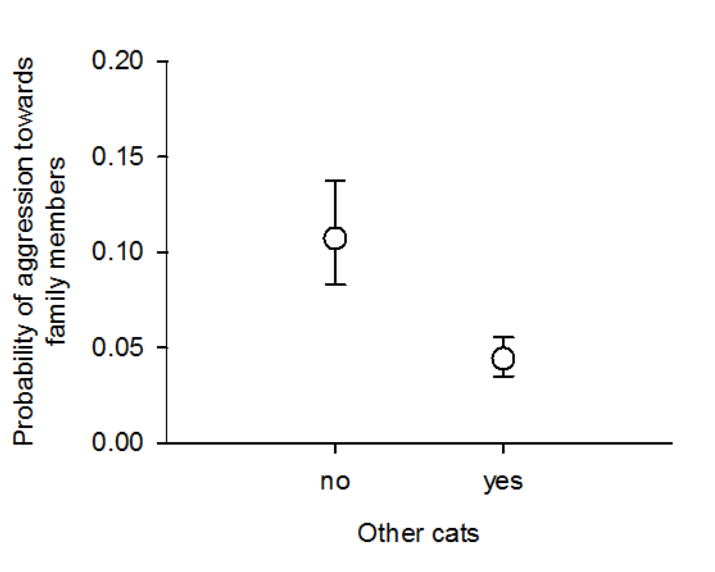

**Supplementary Figure S1.** Effect of the presence of other cats in the household on the probability of aggression towards family members. N = 5726. Error bars indicate 95% confidence limits.

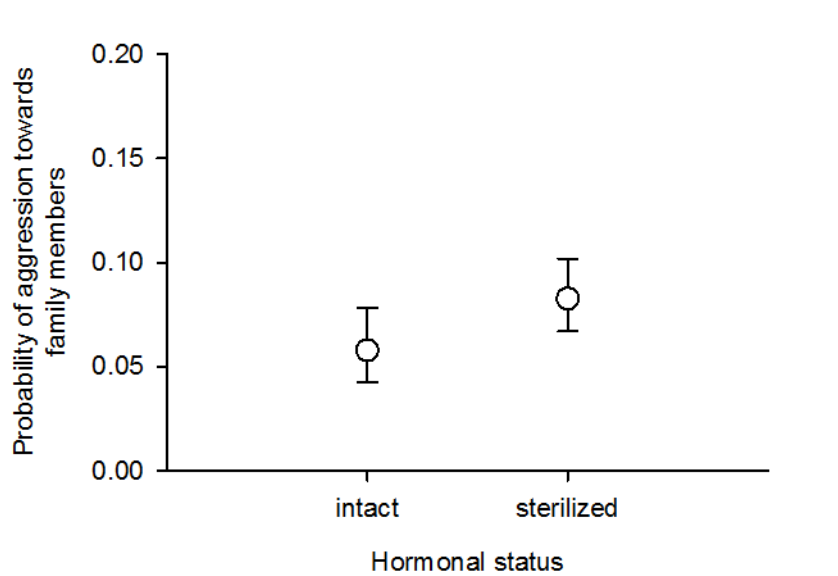

**Supplementary Figure S2.** Effect of hormonal status on the probability of aggression towards family members. N = 5726. Error bars indicate 95% confidence limits.

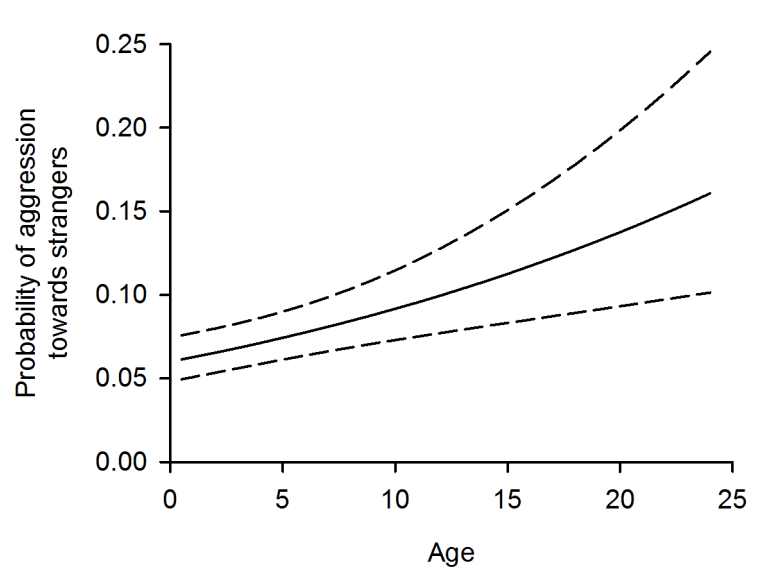

**Supplementary Figure S3.** Effect of age on the probability of aggression towards strangers. N = 5726.

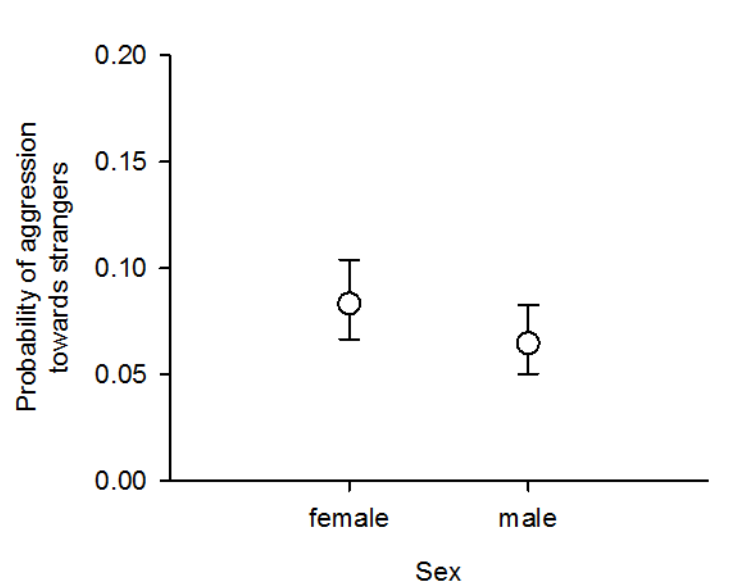

**Supplementary Figure S4.** Effect of sex on the probability of aggression towards strangers. N = 5726. Error bars indicate 95% confidence limits.



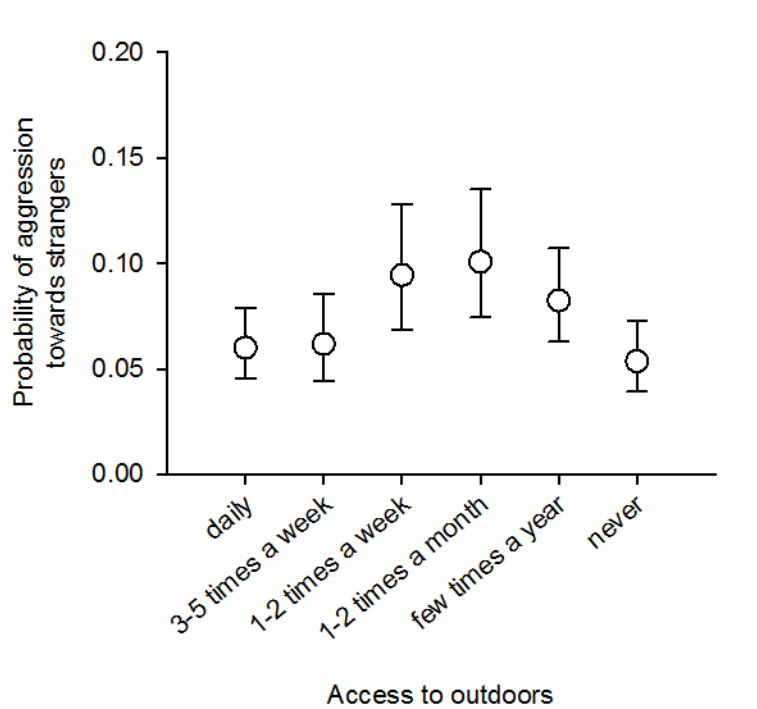

**Supplementary Figure S5.** Effect of access to outdoors on the probability of aggression towards strangers. N = 5726. Error bars indicate 95% confidence limits.

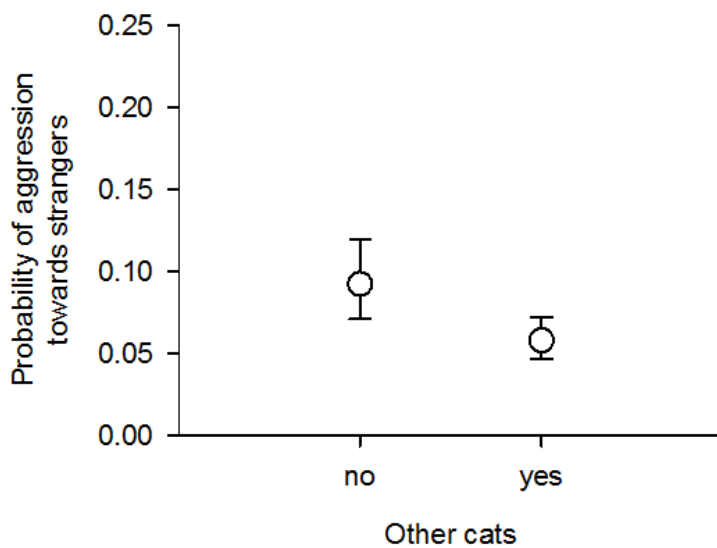

**Supplementary Figure S6.** Effect of the presence of other cats in the household on the probability of aggression towards strangers. N = 5726. Error bars indicate 95% confidence limits.

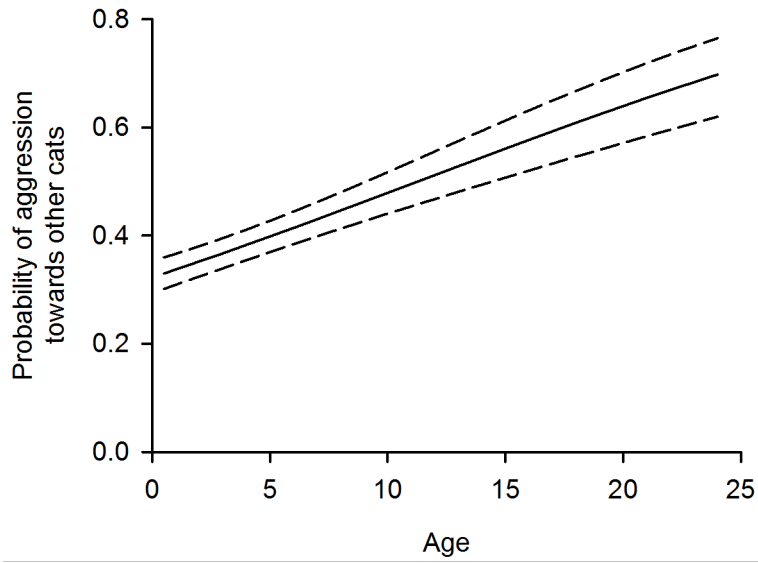

**Supplementary Figure S7.** Effect of age on the probability of aggression towards other cats. N = 5726.

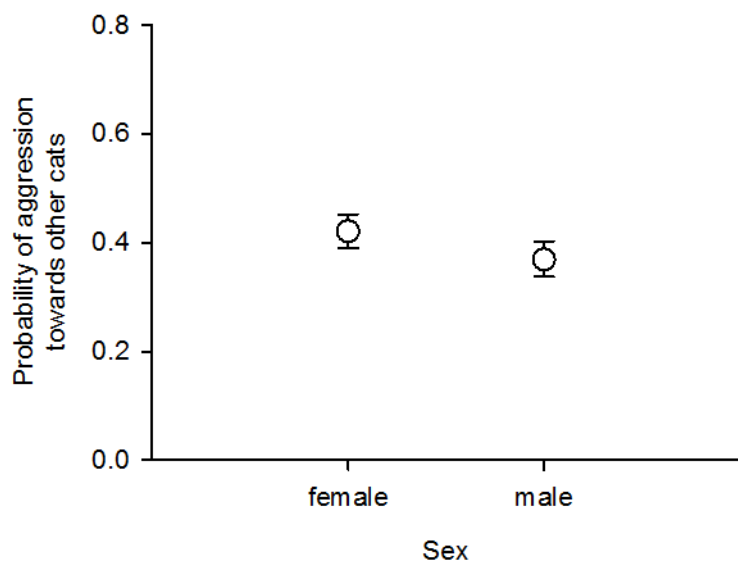

**Supplementary Figure S8.** Effect of sex on the probability of aggression towards other cats. N = 5726. Error bars indicate 95% confidence limits.

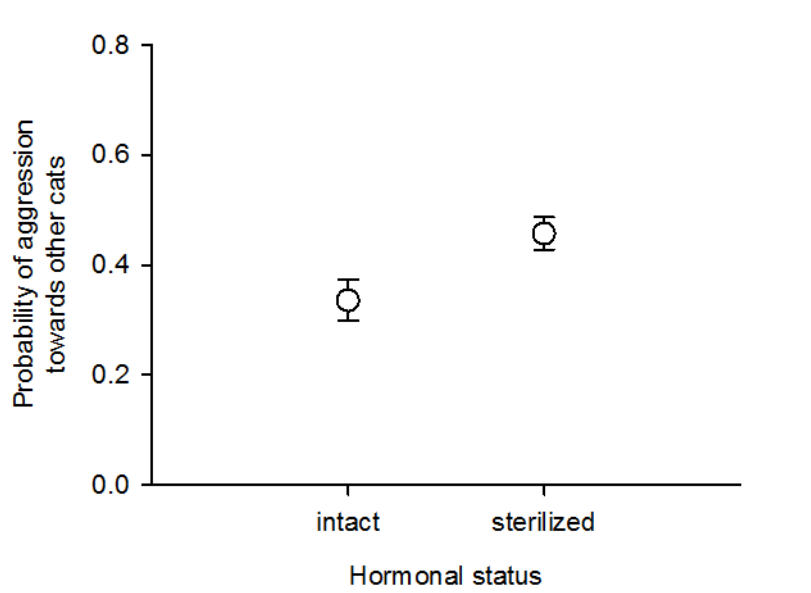

**Supplementary Figure S9.** Effect of hormonal status on the probability of aggression towards other cats. N = 5726. Error bars indicate 95% confidence limits.

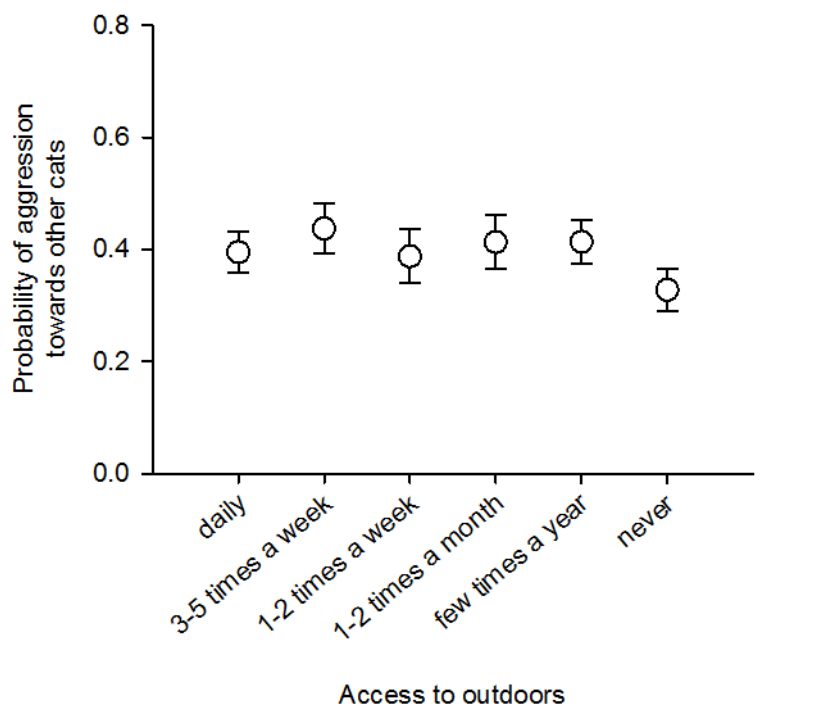

**Supplementary Figure S10.** Effect of access to outdoors on the probability of aggression towards other cats. N = 5726. Error bars indicate 95% confidence limits.

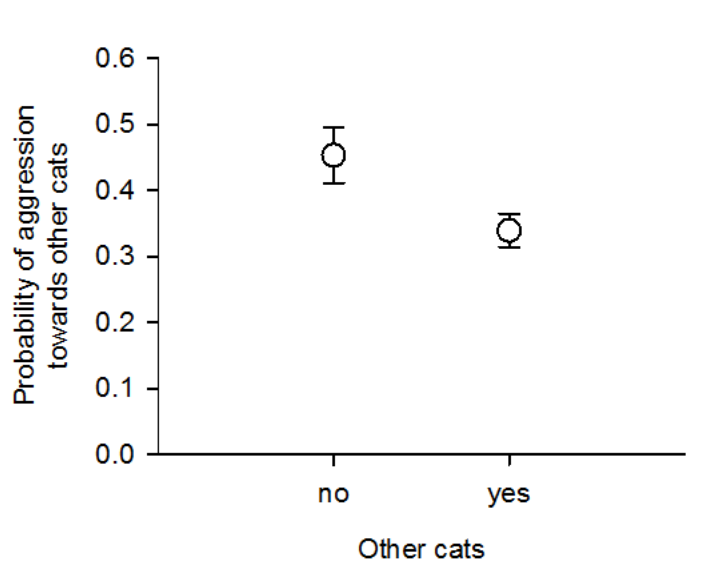

**Supplementary Figure S11.** Effect of the presence of other cats in the household on the probability of aggression towards other cats. N = 5726. Error bars indicate 95% confidence limits.

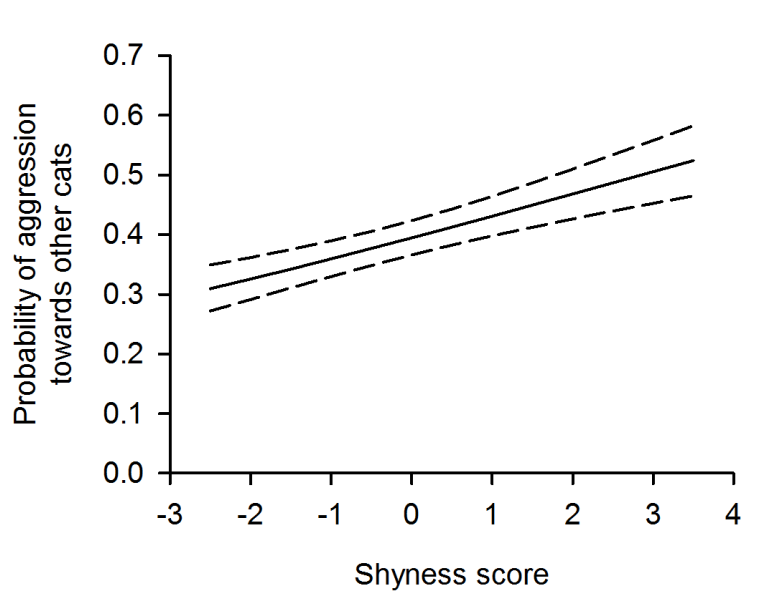

**Supplementary Figure S12.** Effect of shyness score on the probability of aggression towards other cats. N = 5726.

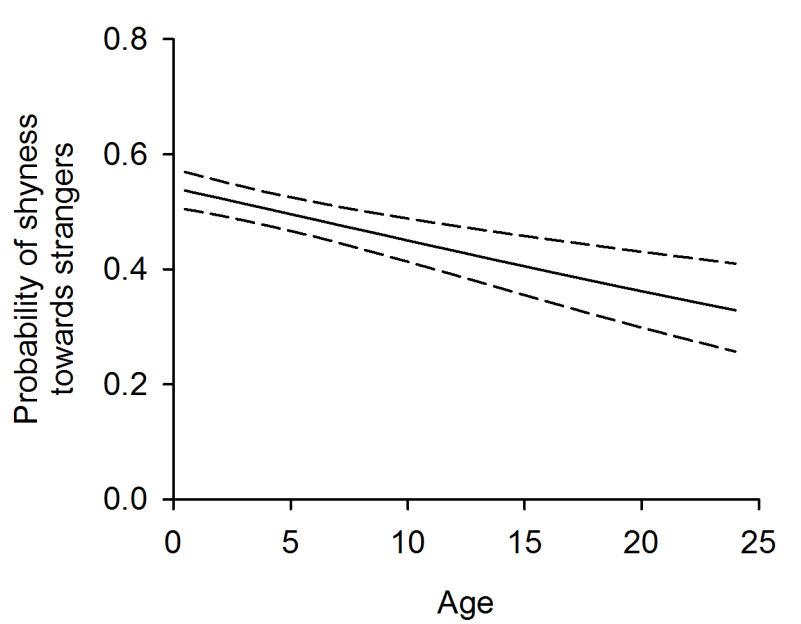

**Supplementary Figure S13.** Effect of age on the probability of shyness towards strangers. N = 5726.

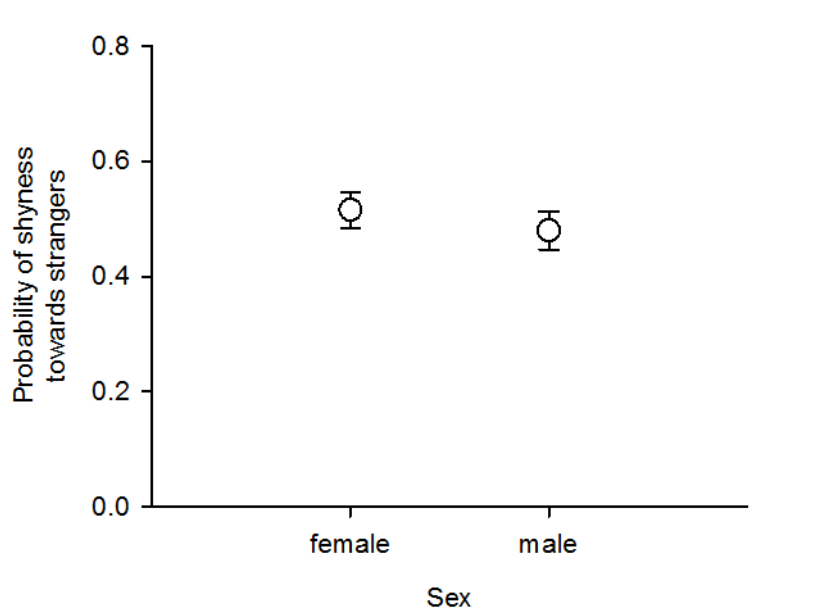

**Supplementary Figure S14.** Effect of sex on the probability of shyness towards strangers. N = 5726. Error bars indicate 95% confidence limits.

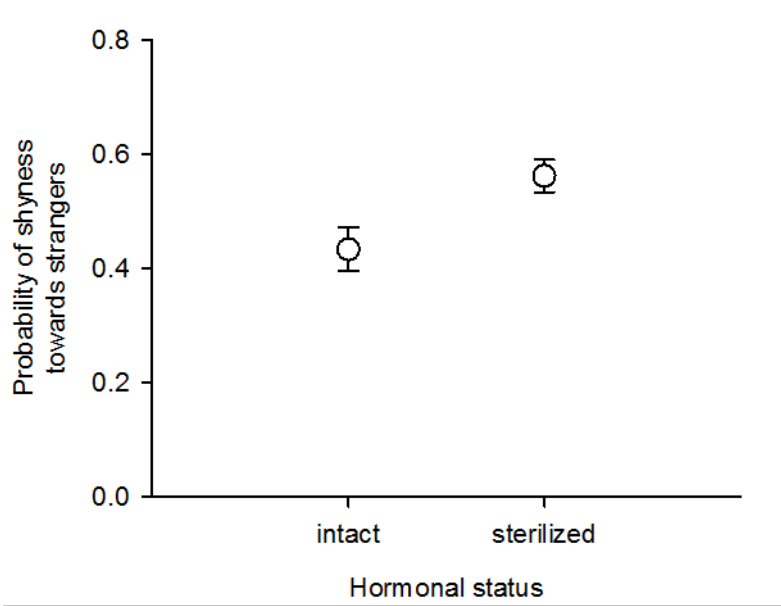

**Supplementary Figure S15.** Effect of hormonal status on the probability of shyness towards strangers. N = 5726. Error bars indicate 95% confidence limits.

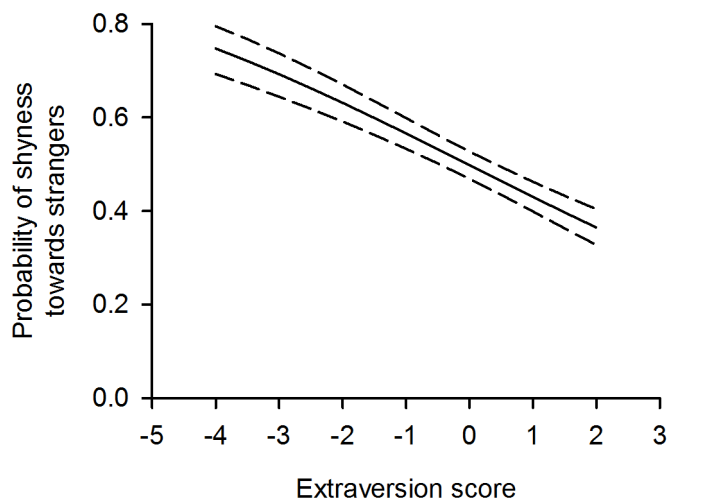

**Supplementary Figure S16.** Effect of extraversion score on the probability of shyness towards strangers. N = 5726. Error bars indicate 95% confidence limits.

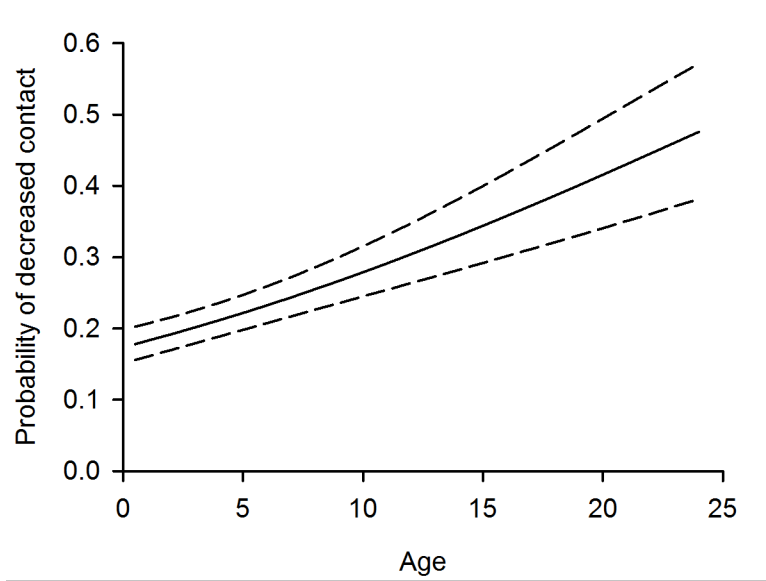

**Supplementary Figure S17.** Effect of age on the probability of decreased contact. N = 5726.

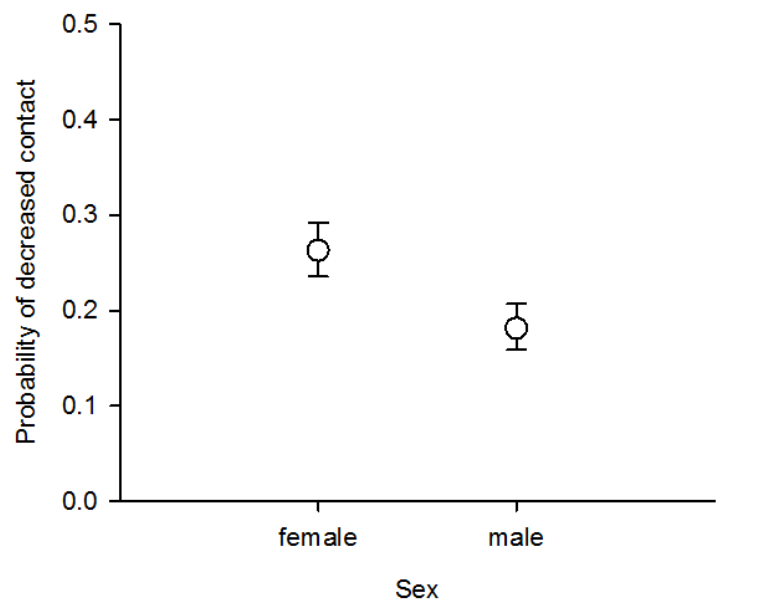

**Supplementary Figure S18.** Effect of sex on the probability of decreased contact. N = 5726. Error bars indicate 95% confidence limits.

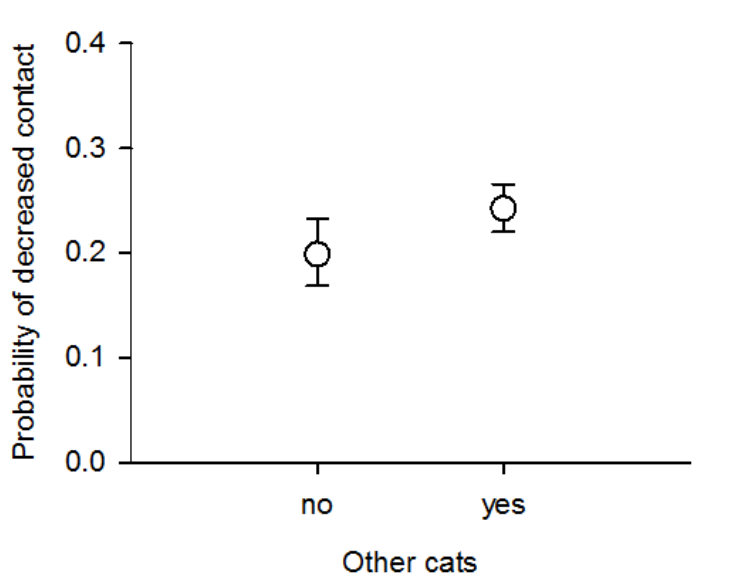

**Supplementary Figure S19.** Effect of the presence of other cats in the household on the probability of decreased contact. N = 5726. Error bars indicate 95% confidence limits.

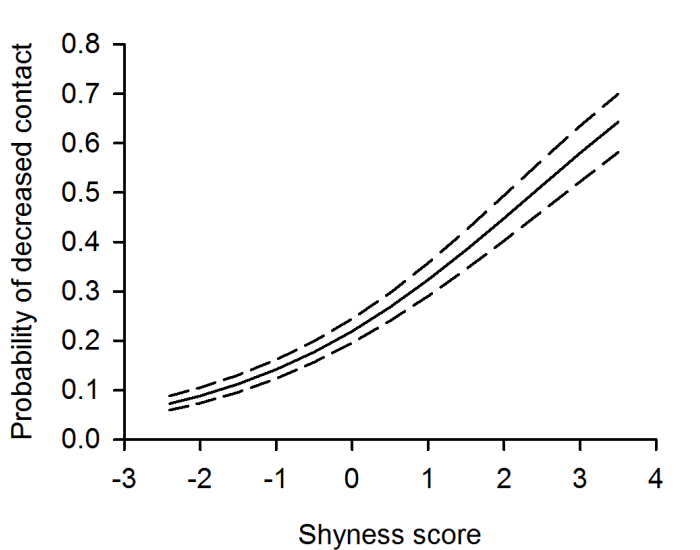

**Supplementary Figure S20.** Effect of shyness score on the probability of decreased contact. N = 5726.



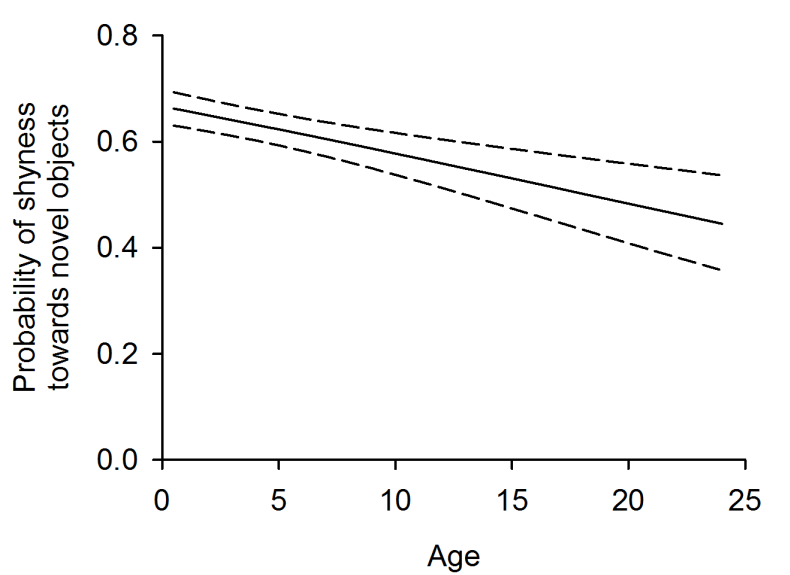

**Supplementary Figure S21.** Effect of age on the probability of shyness towards novel objects. N = 5726.

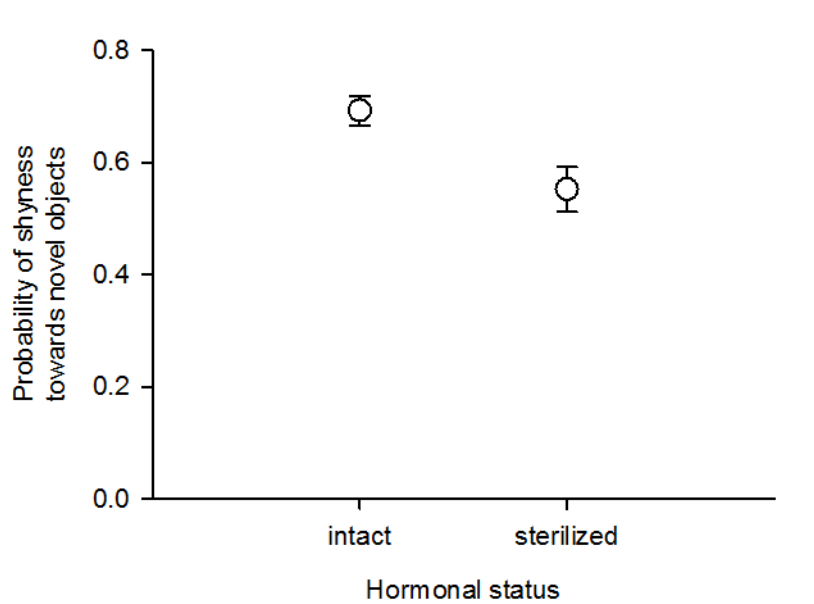

**Supplementary Figure S22.** Effect of hormonal status on the probability of shyness towards novel objects. N = 5726. Error bars indicate 95% confidence limits.

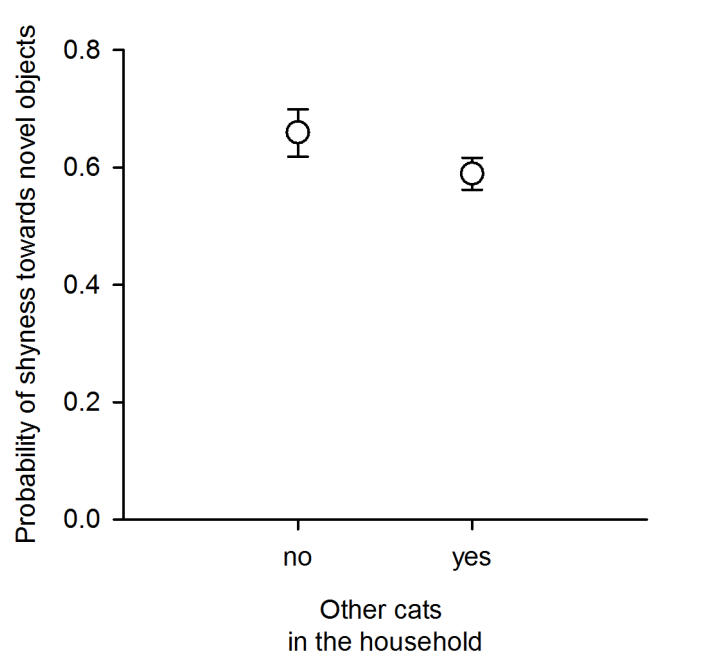

**Supplementary Figure S23.** Effect of the presence of other cats in the household on the probability of shyness towards novel objects. N = 5726. Error bars indicate 95% confidence limits.

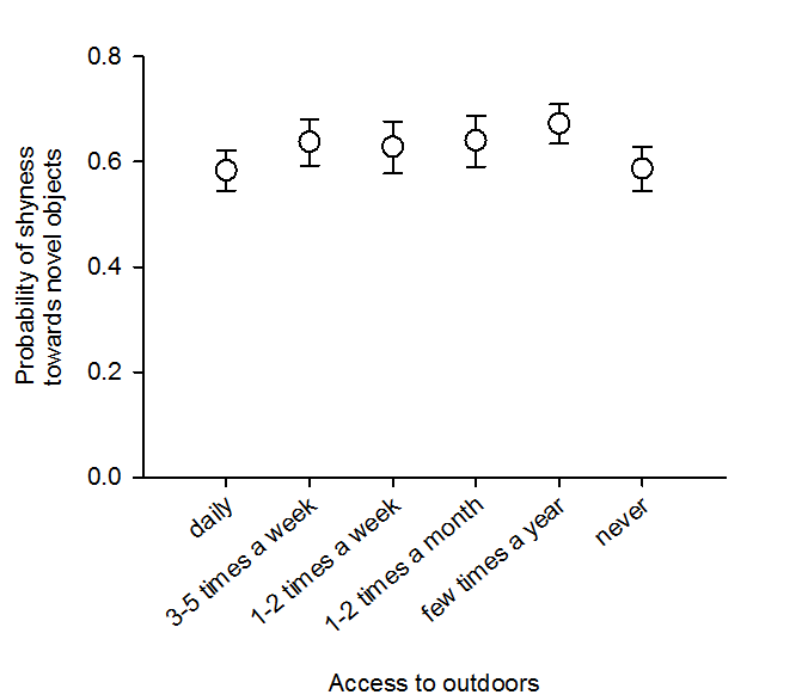

**Supplementary Figure S24.** Effect of access to outdoors on the probability of shyness towards novel objects. N = 5726. Error bars indicate 95% confidence limits.

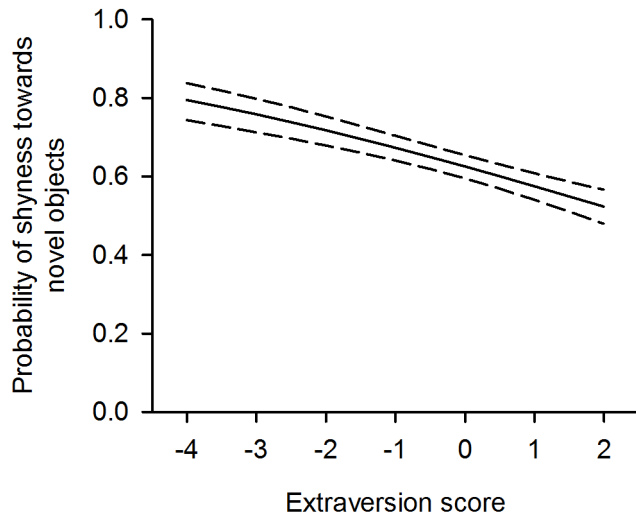

**Supplementary Figure S25.** Effect of extraversion score on the probability of shyness towards novel objects. N = 5726.

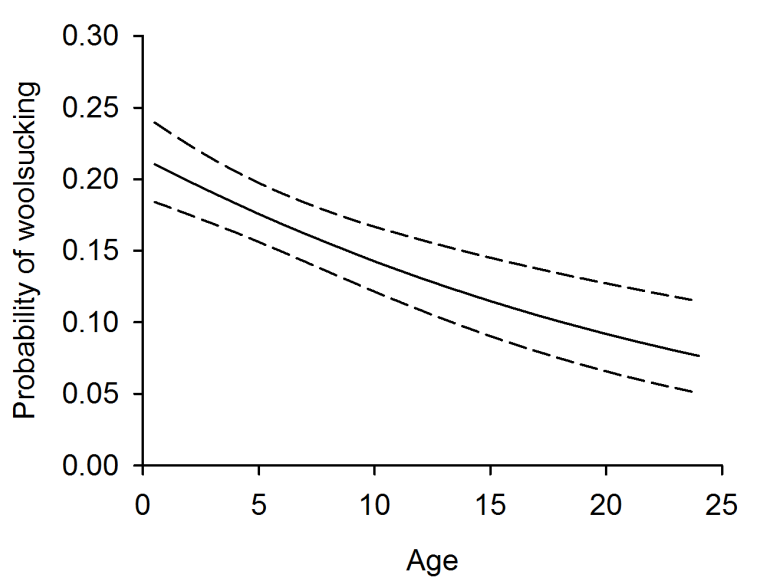

**Supplementary Figure S26.** Effect of age on the probability of wool sucking. N = 4925.

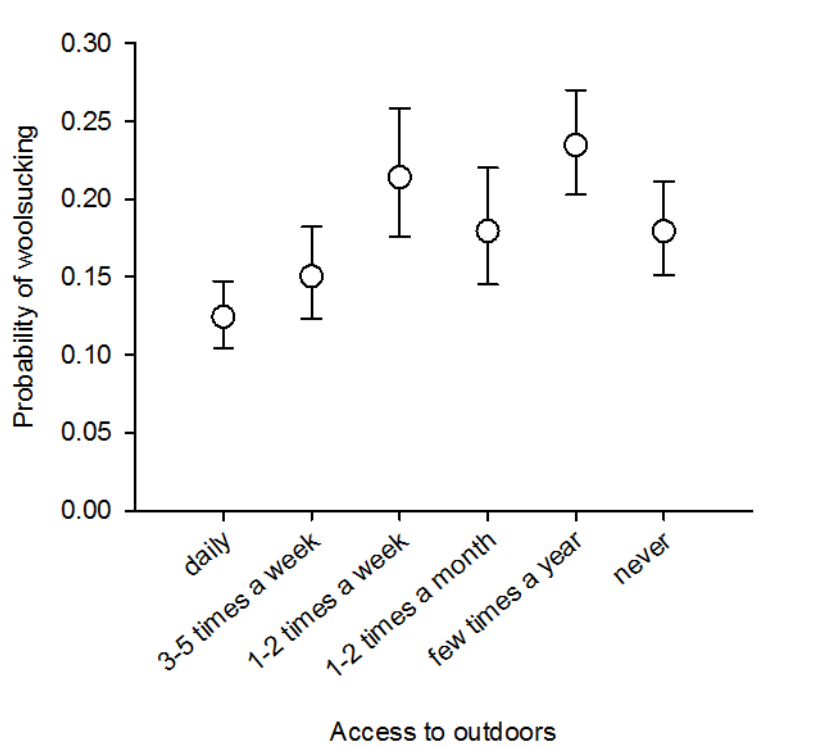

**Supplementary Figure S27.** Effect of access to outdoors on the probability of wool sucking. N = 4925. Error bars indicate 95% confidence limits.

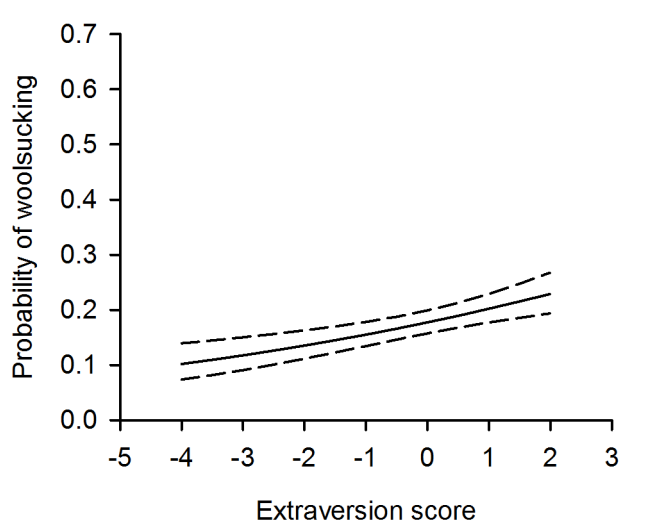

**Supplementary Figure S28.** Effect of extraversion score on the probability of wool sucking. N = 4925.

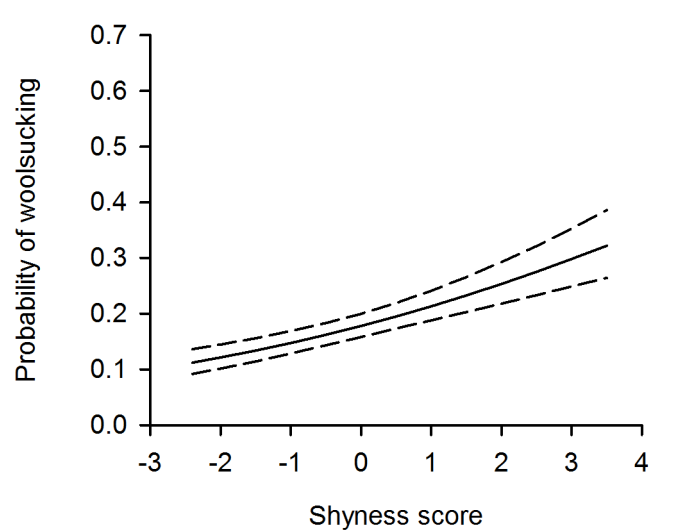

**Supplementary Figure S29.** Effect of shyness score on the probability of wool sucking. N = 4925.

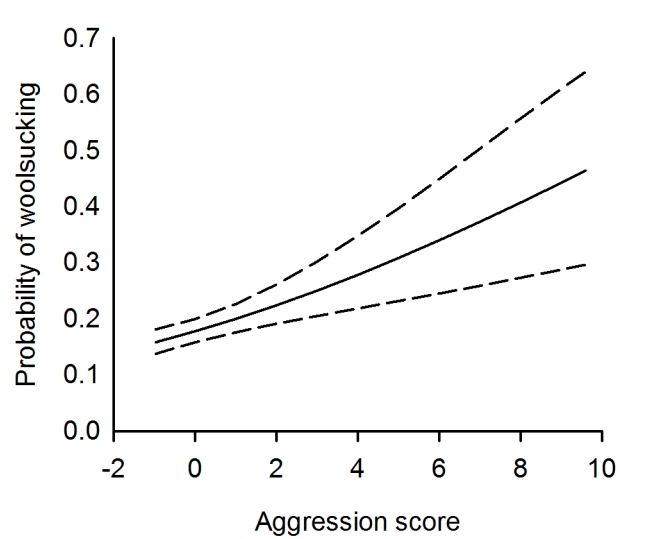

**Supplementary Figure S30.** Effect of aggression score on the probability of wool sucking. N = 4925.

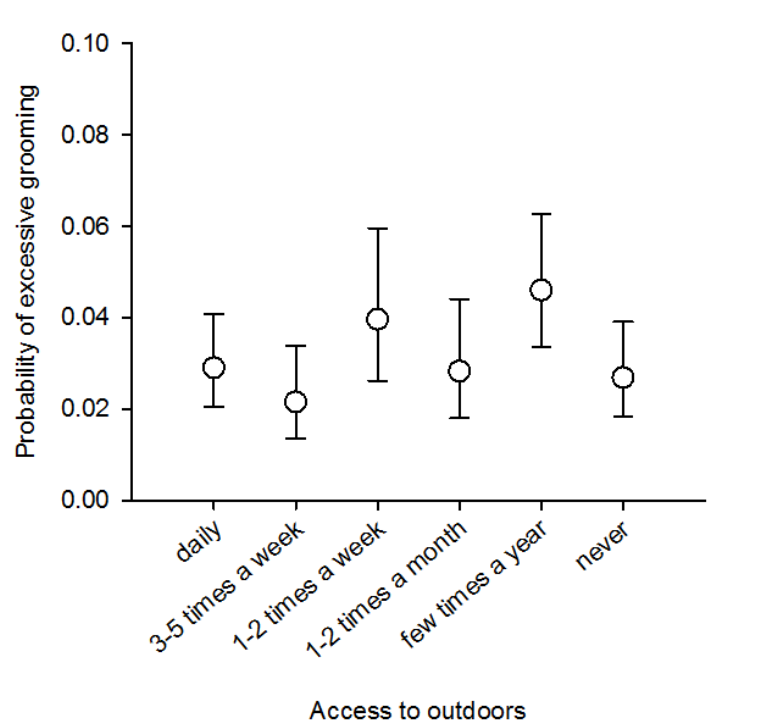

**Supplementary Figure S31.** Effect of access to outdoors on the probability of excessive grooming. N = 5683. Error bars indicate 95% confidence limits.

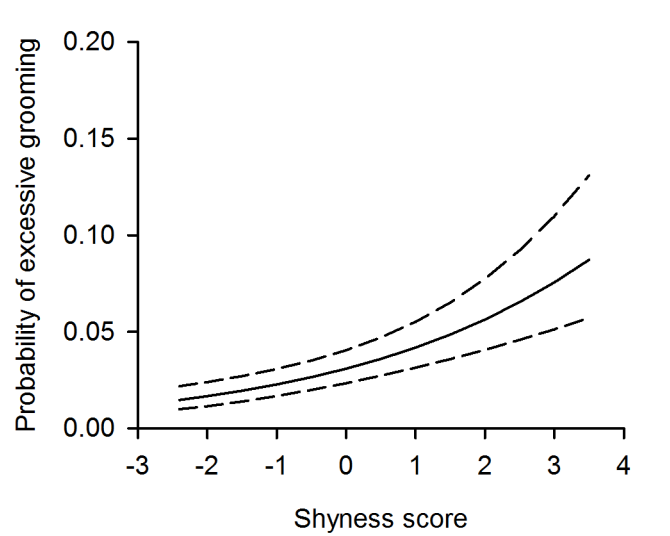

**Supplementary Figure S32.** Effect of shyness score on the probability of excessive grooming. N = 5683.

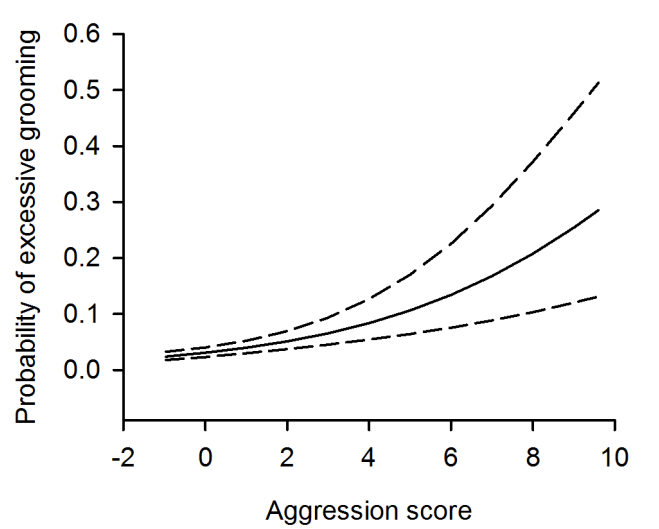

**Supplementary Figure S33.** Effect of aggression score on the probability of excessive grooming. N = 5683.

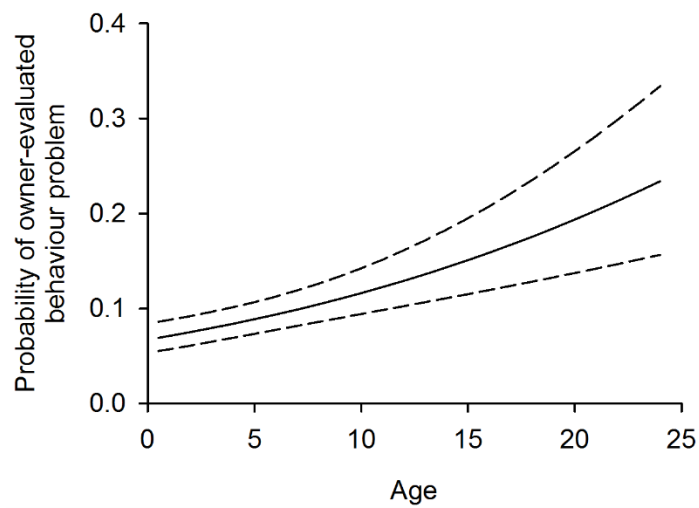

**Supplementary Figure S34.** Effect of age on the probability of owner-evaluated behaviour problem. N = 5550.

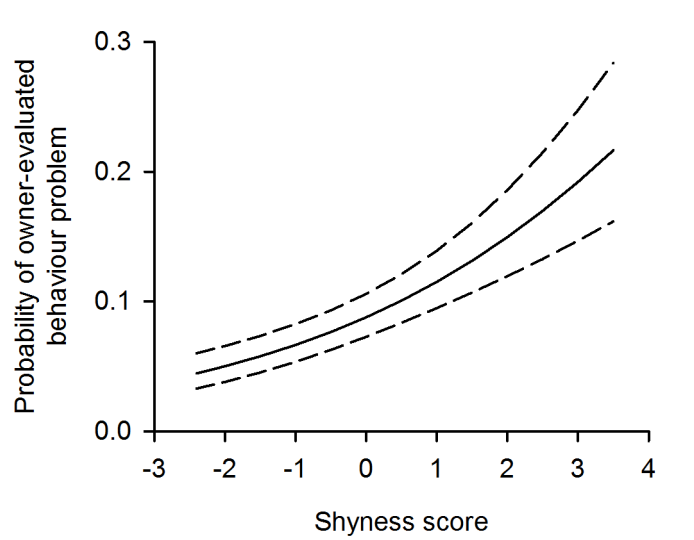

**Supplementary Figure S35.** Effect of shyness score on the probability of owner-evaluated behaviour problem. N = 5550.

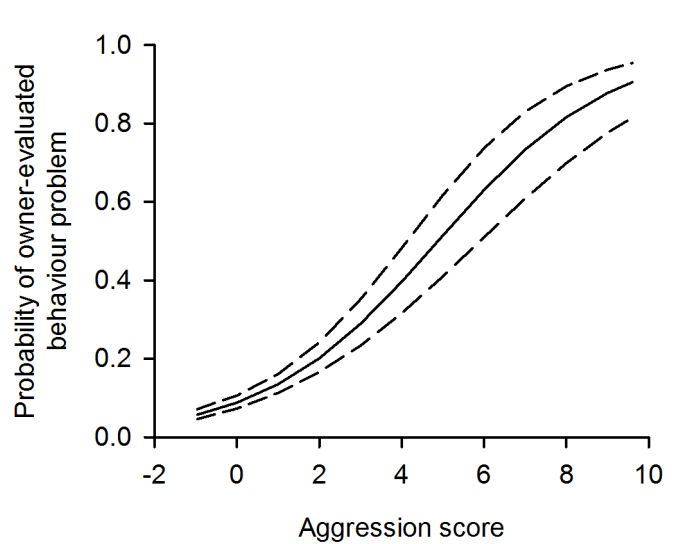

**Supplementary Figure S36.** Effect of aggression score on the probability of owner-evaluated behaviour problem. N = 5550.



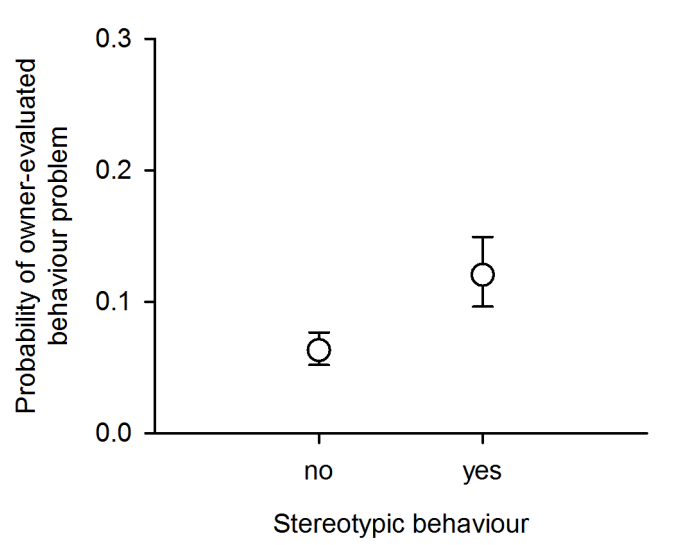

**Supplementary Figure S37.** Effect of the occurrence of stereotypic behaviour on the probability of owner-evaluated behaviour problem. N = 5550.
